# Supplementary material
Source: ML conference proceedings conference paper supplement (https://proceedings.neurips.cc/paper_files/paper/2019/hash/bbcbff5c1f1ded46c25d28119a85c6c2-Abstract.html)
Supplement: Supplementary file [file bbcbff5c1f1ded46c25d28119a85c6c2-Supplemental.zip]

## Supplementary Data

### 1 Architectures

We model the conditional template network architecture as a decoder with a dense layer followed by several upsampling and convolutional levels. Class attributes are encoded as one-hot representations, and continuous attributes are encoded as scalars. For toy datasets, we use a dense layer from the input attributes to a  $4 \times 4$  image with  $k$  features followed by three upsampling levels with two convolution layers each with 16 features each. The value for  $k$  is set to 8 in most situations, and in the latent variable experiment, we avoid over-fitting by using a bottleneck of 1 and  $k$  of 2, for both our method and the baseline. Unconditional templates involve a single layer with a learnable parameter at each pixel.

For our conditional 3D neuroimaging template, we use a dense layer to a  $80 \times 96 \times 112$  3D image with 8 features, followed by a level of upsampling with three convolution layers and 8 features. All kernels are of size 3.

We base our design for the registration network on the architecture described in recent learning-based registration frameworks [9]. Specifically, we use a U-Net style architecture with four downsampling and upsampling layers, each involving a convolutional layer with 32 features and 3x3 kernel size. This is followed by two more convolution layers. For baseline templates – instances, and those produced by decoder-based models – we learn a registration network using the same architecture.

### 2 Quantitative Measures

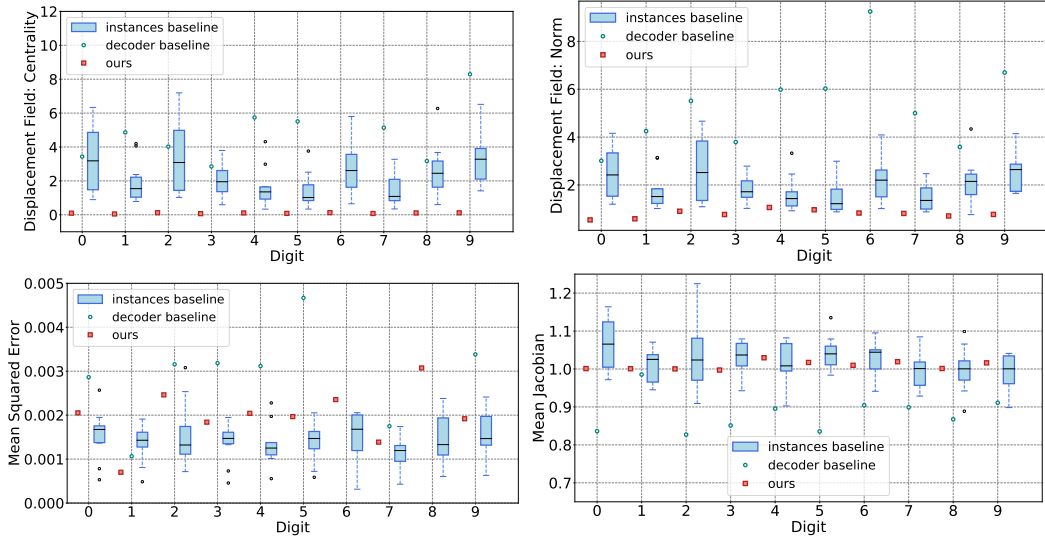

Figure 9: **Quantitative measures.** Top: Centrality and average deformation norm for templates generated by our model and the baselines on the D-class variant of MNIST. We find that our models yield more central templates. Bottom: Both MSE and Jacobians determinants measures indicate good deformations for all models.

### 3 Figures for additional benchmark experiments

Below we show the figures for the missing data, the latent attributes, and variability experiments.

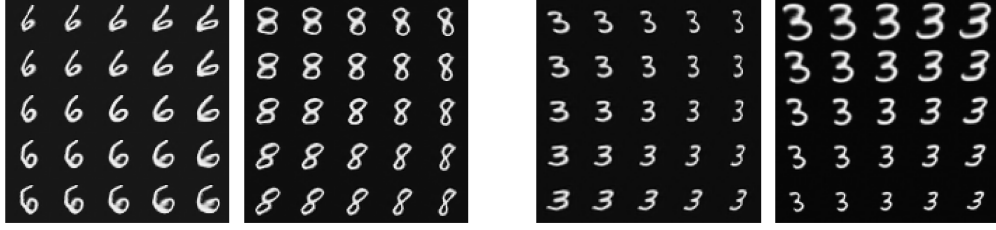

Figure 10: **Variability.** **Left:** Images are synthesized by warping a learned template from the D-class dataset along the main two axes found by applying PCA to test deformation fields. **Right:** Images are synthesized by warping learned template using the D-class-scale along the main two axes found by applying PCA. The first model uses scale as an attribute, learning mostly *other* meaningful geometric deformations. The second model does not use scale as an attribute; consequently both principal components are dominated by scale.

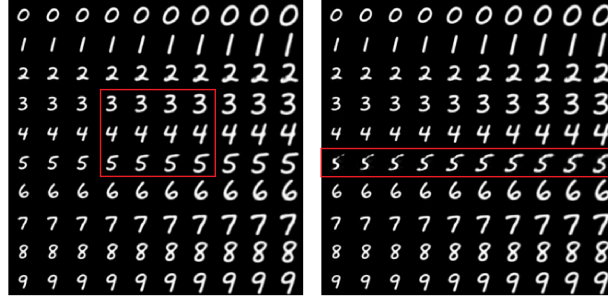

Figure 11: **Missing attributes.** Left: during training, digits 3-5 are not synthesized using scaling 0.9–1.1. Right: during training, only 5 examples of digit 5 are given. Red boxes highlight templates build with attributes where data was held out.

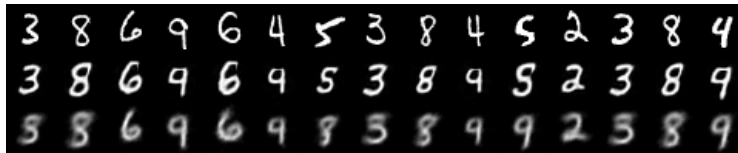

Figure 12: **Latent attribute results.** The top row shows sample input digits. The middle row shows our reconstruction for those input images, highlighting that the model learns a template for each digit type even when the digit attribute is not explicitly given. The bottom row shows templates built using an auto encoder with a single neuron bottleneck, showing that the main variation captured in this manner encourages small pixel intensity error, rather than the geometric difference minimized by our method.

## 4 Quickdraw result examples

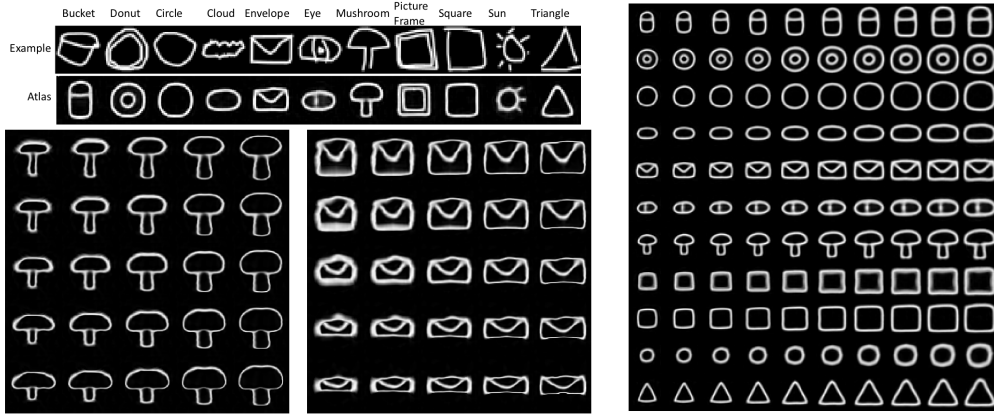

Figure 13: **Quickdraw example templates.** Left: example and learned atlases for the D-class QuickDraw dataset, and below variability examples similar to Figure 10-left. Right: templates for different scales and classes learned using D-class-scale simulations.

## 5 Additional neuroimaging results

Below we show additional figures of neuroimaging results, including segmentations for (conditional) atlases, and example deformations.

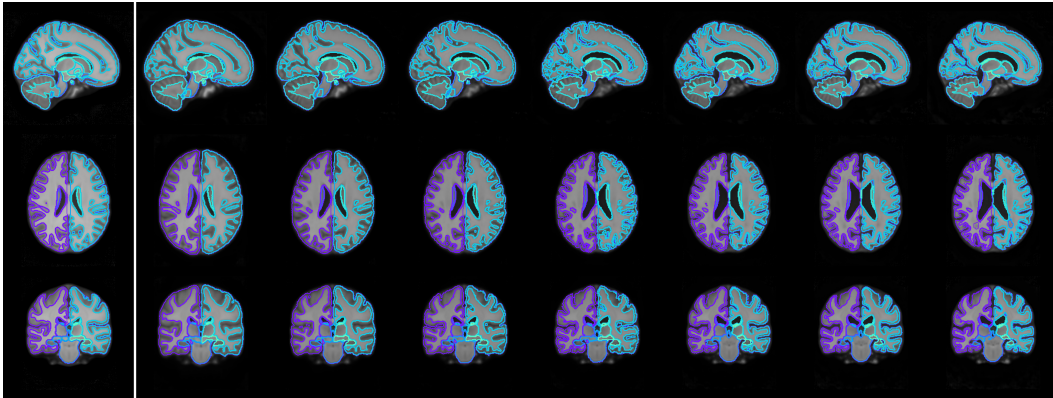

Figure 14: **Segmentations.** Example segmentations overlaid with different brain views for our unconditional template (left) and conditional templates (right) varying by age.

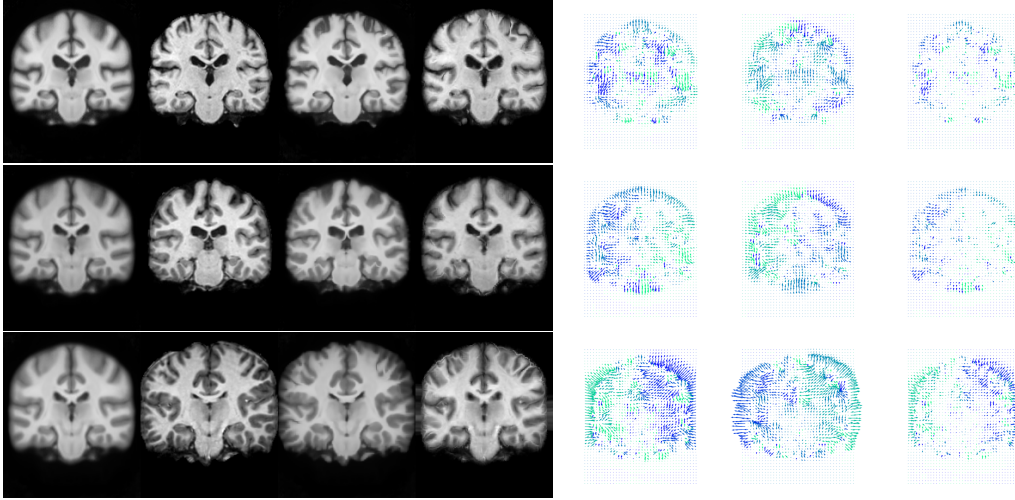

Figure 15: **Example 3D neuroimaging deformations.** Frames include: coronal slices for age-conditional template, subject scan, warped template onto subject, warped subject onto template (using inverse field), and the first two directions of the 3D forward and inverse warps, and velocity field.

## 6 Supplementary Video

We include a supplementary video at [http://voxelmorph.mit.edu/atlas\\_creation/](http://voxelmorph.mit.edu/atlas_creation/), illustrating our method’s ability of synthesizing templates on-demand based on given attributes. Specifically, the video illustrates the brain template conditioned on age, between 15 and 90 years old, also used as the video frame index.
